# Supplementary material for: Unveiling GH7 cellulases from Malbranchea cinnamomea for enhanced saccharification of biorefinery relevant pretreated lignocellulosic biomass
Source: Research Square preprint supplement (doi:10.21203/rs.3.rs-8567903/v1), 2026-02-10
Supplement: Supplementary file 1 [file 4f2a3d51bc6ef68098be204c.docx]

**Figure S1:** Schematic representation of steps involved in cloning and expression of EG7A_MALCI and CBH7A_MALCI in *P. pastoris* expression host.

**Figure S2:** Screening of clones grown on BMMY medium for endoglucanase (EG7A_MALCI) and cellobiohydrolase (CBH7A_MALCI) activity using barley β-glucan and *p*NPC as respective substrates. Bars represent mean± SE (n=3).

**Figure S3:** (A) Homology model of EG7A_MALCI*,* and (B) Superimposed structure of endoglucanase from *M. cinnamomea* (blue)and *Fusarium oxysporum-*1ovwA (yellow)

**Figure S4:** (A) Homology model of CBH7A_MALCI (B) Superimposed structure of CBH from *M. cinnamomea* (red)and *Dictostyleum purpureum-*4zzpA (green)


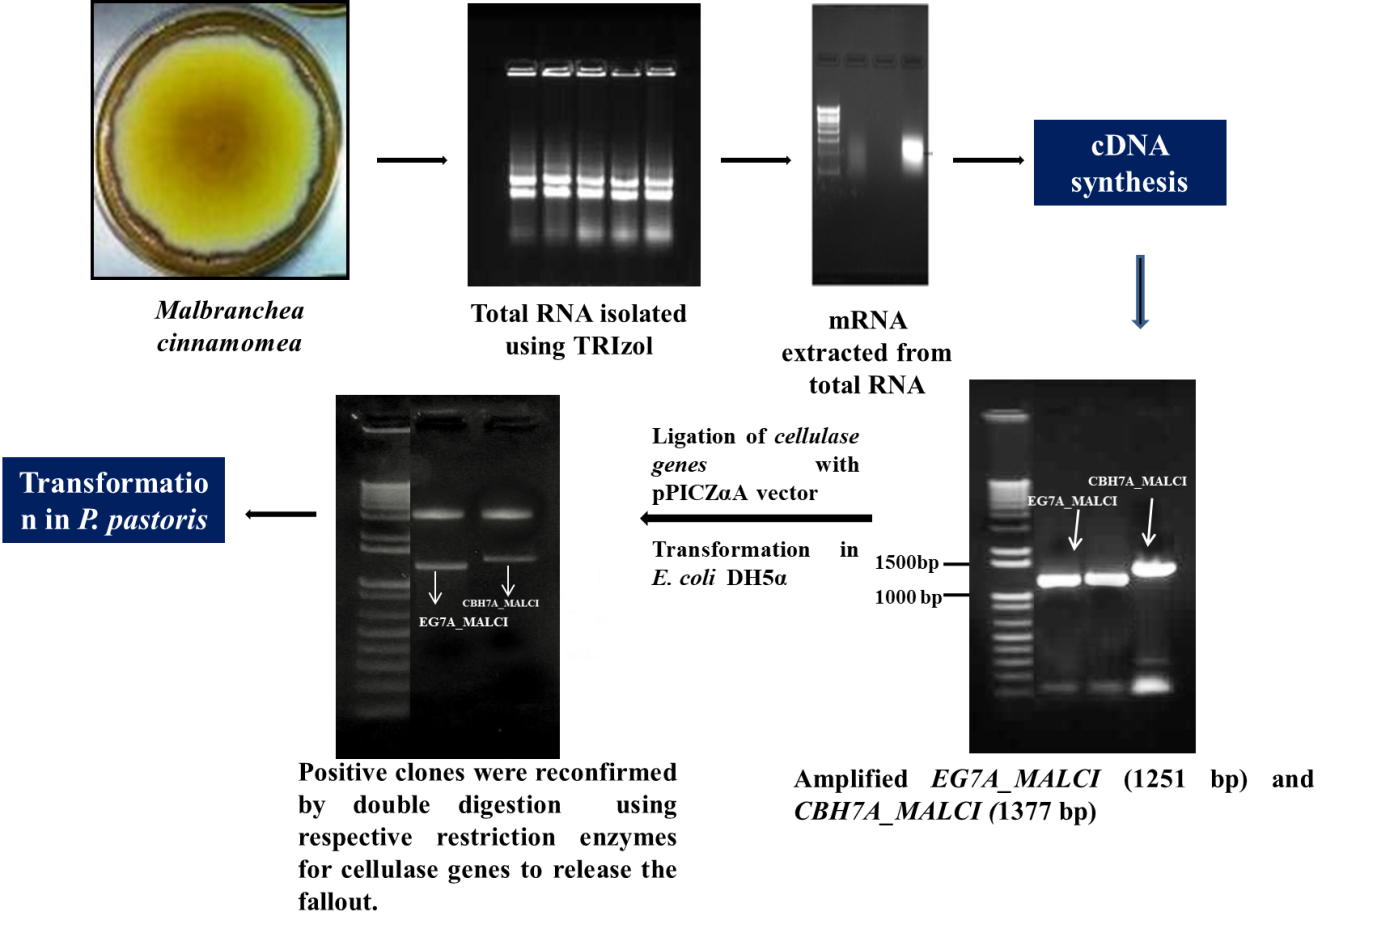


**Figure S1:** Schematic representation of steps involved in cloning and expression of EG7A_MALCI and CBH7A_MALCI in *P. pastoris* expression host.

**Figure S2:** Screening of clones grown on BMMY medium for endoglucanase (EG7A_MALCI) and cellobiohydrolase (CBH7A_MALCI) activity using barley β-glucan and *p*NPC as respective substrates.


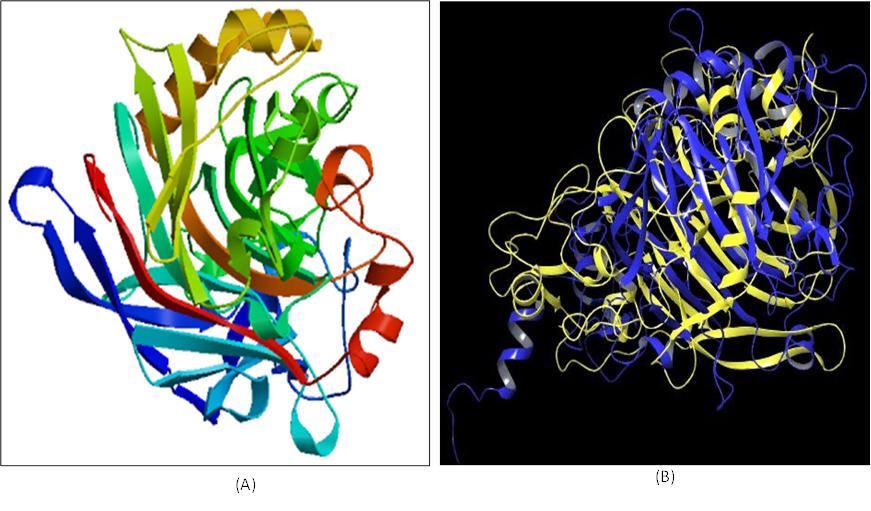


**Figure S3:** (A) Homology model of EG7A_MALCI*,* and (B) Superimposed structure of endoglucanase from *M. cinnamomea* (blue)and *Fusarium oxysporum-*1ovwA (yellow)


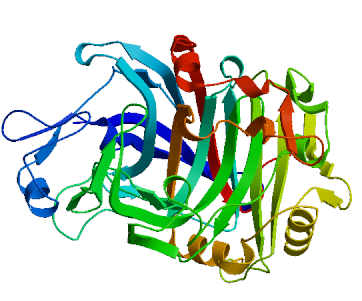

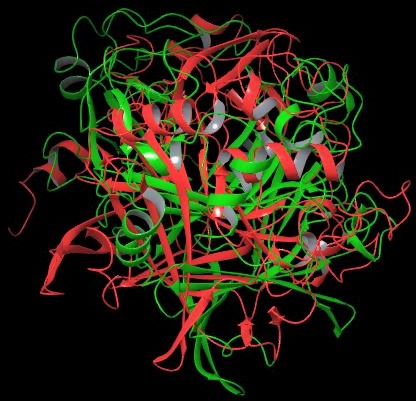


(A)

(B)

**Figure S4:** (A) Homology model of CBH7A_MALCI (B) Superimposed structure of CBH from *M. cinnamomea* (red)and *Dictostyleum purpureum-*4zzpA (green)
